# Supplementary material for: The Outbreak of SARS-CoV-2 Pandemic and the Well-Being of Polish Students: The Risk Factors of the Emotional Distress during COVID-19 Lockdown
Source: MDPI journal article supplement (doi:10.3390/jcm10050944), 2021-02-28
Supplement: s1 [file s1]

**Table S1:** The results of the DASS total score for the field of study.

| Field of study         |                        |       |        |       |                          |                          |         |                                    |
|------------------------|------------------------|-------|--------|-------|--------------------------|--------------------------|---------|------------------------------------|
| DASS<br>total<br>score | Group                  | Mean  | Median | SD    | Kruskal–Wallis<br>H test | Bonferroni<br>correction | p-value | Multiple comparisons*<br>(p-value) |
|                        | I. Arts and humanities | 43.51 | 39.00  | 28.98 | 16.16                    | 0.01                     | 0.0028  | II vs. III<br>(0.009)              |
|                        | II. Sciences           | 46.08 | 42.00  | 27.91 |                          |                          |         |                                    |
|                        | III. Medicine          | 36.56 | 31.00  | 25.49 |                          |                          |         |                                    |
|                        | IV. Engineering        | 38.24 | 32.00  | 26.79 |                          |                          |         |                                    |
|                        | V. Social sciences     | 39.65 | 35.00  | 28.14 |                          |                          |         |                                    |

\* only significant

**Table S1.2:** The results of the DASS depression scale for the field of study.

| Field of study              |                        |       |        |       |                          |                          |         |                                    |
|-----------------------------|------------------------|-------|--------|-------|--------------------------|--------------------------|---------|------------------------------------|
| DASS<br>Depression<br>Scale | Group                  | Mean  | Median | SD    | Kruskal–Wallis<br>H test | Bonferroni<br>correction | p-value | Multiple comparisons*<br>(p-value) |
|                             | I. Arts and humanities | 15.42 | 13.00  | 10.92 | 19.82                    | 0.01                     | 0.0005  | II vs. III<br>(0.012)              |
|                             | II. Sciences           | 16.65 | 16.00  | 11.44 |                          |                          |         |                                    |
|                             | III. Medicine          | 12.73 | 10.00  | 10.01 |                          |                          |         |                                    |
|                             | IV. Engineering        | 14.74 | 12.00  | 11.15 |                          |                          |         |                                    |
|                             | V. Social sciences     | 13.93 | 12.00  | 10.80 |                          |                          |         |                                    |

\* only significant

**Table S1.3:** The results of the DASS anxiety scale for the field of study.

| Field of study           |                        |      |        |      |                          |                          |         |                       |
|--------------------------|------------------------|------|--------|------|--------------------------|--------------------------|---------|-----------------------|
| DASS<br>Anxiety<br>Scale | Group                  | Mean | Median | SD   | Kruskal–Wallis<br>H test | Bonferroni<br>correction | p-value | Multiple comparisons* |
|                          | I. Arts and humanities | 9.02 | 6.00   | 9.63 | 14.00                    | -                        | 0.0073  | -                     |
|                          | II. Sciences           | 9.67 | 6.00   | 9.21 |                          |                          |         |                       |
|                          | III. Medicine          | 7.26 | 4.00   | 8.00 |                          |                          |         |                       |
|                          | IV. Engineering        | 7.24 | 4.00   | 8.07 |                          |                          |         |                       |
|                          | V. Social sciences     | 8.52 | 6.00   | 8.64 |                          |                          |         |                       |

\* only significant

**Table S1.4:** The results of the DASS stress scale for the field of study.

| Field of study          |       |      |        |    |                          |                          |         |                       |
|-------------------------|-------|------|--------|----|--------------------------|--------------------------|---------|-----------------------|
| DASS<br>Stress<br>Scale | Group | Mean | Median | SD | Kruskal–Wallis<br>H test | Bonferroni<br>correction | p-value | Multiple comparisons* |

|  |                               |       |       |       |       |   |        |   |
|--|-------------------------------|-------|-------|-------|-------|---|--------|---|
|  | <b>I. Arts and humanities</b> | 19.07 | 19.00 | 11.63 | 11.75 | - | 0.0193 | - |
|  | <b>II. Sciences</b>           | 19.77 | 20.00 | 11.12 |       |   |        |   |
|  | <b>III. Medicine</b>          | 16.56 | 16.00 | 10.73 |       |   |        |   |
|  | <b>IV. Engineering</b>        | 16.26 | 26.00 | 10.82 |       |   |        |   |
|  | <b>V. Social sciences</b>     | 17.19 | 16.00 | 11.51 |       |   |        |   |

\* only significant

**Table S2:** The results of the DASS total score for the most prevalent difficulties during pandemics.

| What was the most difficult for you during pandemics? |                                                           |       |        |       |                       |                       |         |                       |
|-------------------------------------------------------|-----------------------------------------------------------|-------|--------|-------|-----------------------|-----------------------|---------|-----------------------|
|                                                       | Group                                                     | Mean  | Median | SD    | Kruskal–Wallis H test | Bonferroni correction | p-value | Multiple comparisons* |
| DASS Total Score                                      | <b>I. Financial instability</b>                           | 38.92 | 34.00  | 27.65 | 87.51                 | 0.0055                | 0.0000  | IV vs. VII (0.000)    |
|                                                       | <b>II. Fear of infection of the loved ones</b>            | 36.05 | 32.00  | 24.42 |                       |                       |         |                       |
|                                                       | <b>III. Isolation</b>                                     | 40.30 | 34.00  | 27.54 |                       |                       |         |                       |
|                                                       | <b>IV. Changes awaiting the world after the pandemics</b> | 35.69 | 30.00  | 25.47 |                       |                       |         | III vs. IX (0.000)    |
|                                                       | <b>V. Change of the lifestyle</b>                         | 40.35 | 35.00  | 28.44 |                       |                       |         |                       |
|                                                       | <b>VI. Concern about education</b>                        | 35.02 | 28.00  | 27.46 |                       |                       |         |                       |
|                                                       | <b>VII. Loneliness</b>                                    | 51.29 | 52.00  | 26.01 |                       |                       |         | VII vs. IX (0.000)    |
|                                                       | <b>VIII. Fear of being infected</b>                       | 39.01 | 32.00  | 28.34 |                       |                       |         |                       |
|                                                       | <b>IX. I was not afraid</b>                               | 10.23 | 4.00   | 13.85 |                       |                       |         |                       |

\* only significant

**Table S2.2:** The results of the DASS depression scale for the most prevalent difficulties during pandemics.

| What was the most difficult for you during pandemics? |                                                |       |        |       |                       |                       |         |                       |
|-------------------------------------------------------|------------------------------------------------|-------|--------|-------|-----------------------|-----------------------|---------|-----------------------|
|                                                       | Group                                          | Mean  | Median | SD    | Kruskal–Wallis H test | Bonferroni correction | p-value | Multiple comparisons* |
| DASS Depression Scale                                 | <b>I. Financial instability</b>                | 14.29 | 12.00  | 11.17 | 106.69                | 0.0055                | 0.000   | IV vs. VII (0.000)    |
|                                                       | <b>II. Fear of infection of the loved ones</b> | 12.04 | 10.00  | 9.41  |                       |                       |         |                       |
|                                                       | <b>III. Isolation</b>                          | 14.30 | 12.00  | 10.25 |                       |                       |         |                       |

|  |                                                    |       |       |       |  |  |  |                       |
|--|----------------------------------------------------|-------|-------|-------|--|--|--|-----------------------|
|  | IV. Changes awaiting the world after the pandemics | 12.62 | 10.00 | 10.02 |  |  |  | III vs. IX<br>(0.000) |
|  | V. Change of the lifestyle                         | 14.81 | 12.00 | 11.27 |  |  |  | VII vs. IX<br>(0.000) |
|  | VI. Concern about education                        | 12.13 | 10.00 | 9.08  |  |  |  |                       |
|  | VII. Loneliness                                    | 12.38 | 20.00 | 11.3  |  |  |  |                       |
|  | VIII. Fear of being infected                       | 12.32 | 10.00 | 9.74  |  |  |  |                       |
|  | IX. I was not afraid                               | 4.85  | 2.00  | 7.09  |  |  |  |                       |

\* only significant

**Table S2.3:** The results of the DASS anxiety scale for the most prevalent difficulties during pandemics.

| What was the most difficult for you during pandemics? |                                                    |       |        |       |                       |                       |         |                        |
|-------------------------------------------------------|----------------------------------------------------|-------|--------|-------|-----------------------|-----------------------|---------|------------------------|
|                                                       | Group                                              | Mean  | Median | SD    | Kruskal–Wallis H test | Bonferroni correction | p-value | Multiple comparisons*  |
| DASS Anxiety Scale                                    | I. Financial instability                           | 7.82  | 6.00   | 8.31  | 53.84                 | 0.0055                | 0.0000  | III vs. IX<br>(0.001)  |
|                                                       | II. Fear of infection of the loved ones            | 7.58  | 6.00   | 7.67  |                       |                       |         | VII vs. IX<br>(0.000)  |
|                                                       | III. Isolation                                     | 7.59  | 4.00   | 8.94  |                       |                       |         |                        |
|                                                       | IV. Changes awaiting the world after the pandemics | 7.13  | 4.00   | 7.90  |                       |                       |         |                        |
|                                                       | V. Change of the lifestyle                         | 7.67  | 4.00   | 8.88  |                       |                       |         |                        |
|                                                       | VI. Concern about education                        | 7.19  | 2.00   | 9.61  |                       |                       |         |                        |
|                                                       | VII. Loneliness                                    | 9.94  | 8.00   | 8.38  |                       |                       |         | VIII vs. IX<br>(0.000) |
|                                                       | VIII. Fear of being infected                       | 10.55 | 6.00   | 10.10 |                       |                       |         |                        |
|                                                       | IX. I was not afraid                               | 1.69  | 1.00   | 3.91  |                       |                       |         |                        |
|                                                       |                                                    |       |        |       |                       |                       |         |                        |

\* only significant

**Table S2.4:** The results of the DASS stress scale for the most prevalent difficulties during pandemics.

| What was the most difficult for you during pandemics? |       |      |        |    |                       |                       |         |                       |
|-------------------------------------------------------|-------|------|--------|----|-----------------------|-----------------------|---------|-----------------------|
| DASS Stress Scale                                     | Group | Mean | Median | SD | Kruskal–Wallis H test | Bonferroni correction | p-value | Multiple comparisons* |

|  |                                                    |       |       |       |       |        |        |                       |
|--|----------------------------------------------------|-------|-------|-------|-------|--------|--------|-----------------------|
|  | I. Financial instability                           | 16.80 | 16.00 | 11.71 | 74.58 | 0.0055 | 0.0000 | III vs. IX<br>(0.000) |
|  | II. Fear of infection of the loved ones            | 16.44 | 16.00 | 10.37 |       |        |        |                       |
|  | III. Isolation                                     | 18.41 | 18.00 | 11.34 |       |        |        | IV vs. IX<br>(0.000)  |
|  | IV. Changes awaiting the world after the pandemics | 15.94 | 14.00 | 10.71 |       |        |        |                       |
|  | V. Change of the lifestyle                         | 17.89 | 18.00 | 11.26 |       |        |        |                       |
|  | VI. Concern about education                        | 15.70 | 14.00 | 11.51 |       |        |        | VII vs. IX<br>(0.000) |
|  | VII. Loneliness                                    | 20.98 | 22.00 | 10.41 |       |        |        |                       |
|  | VIII. Fear of being infected                       | 16.15 | 14.00 | 11.67 |       |        |        |                       |
|  | IX. I was not afraid                               | 3.69  | 1.00  | 5.76  |       |        |        |                       |

\* only significant

**Table S3:** The results of the DASS total score for the most prevalent chronic diseases.

| Do you have any chronic disease? |                      |       |        |       |                       |                       |         |                       |
|----------------------------------|----------------------|-------|--------|-------|-----------------------|-----------------------|---------|-----------------------|
|                                  | Group                | Mean  | Median | SD    | Kruskal-Wallis H test | Bonferroni correction | p-value | Multiple comparisons* |
| DASS total score                 | I. Mental disorders  | 58.83 | 58.00  | 29.27 | 44.14                 | 0.0071                | 0.0000  | I vs. VII<br>(0.000)  |
|                                  | II. Thyroid diseases | 45.05 | 40.00  | 29.16 |                       |                       |         |                       |
|                                  | III. Allergy         | 43.63 | 37.00  | 24.81 |                       |                       |         |                       |
|                                  | IV. Diabetes         | 43.60 | 42.00  | 22.94 |                       |                       |         |                       |
|                                  | V. Asthma            | 44.82 | 41.00  | 28.09 |                       |                       |         |                       |
|                                  | VI. Other            | 43.96 | 40.00  | 25.48 |                       |                       |         |                       |
|                                  | VII. No              | 36.66 | 32.00  | 26.08 |                       |                       |         |                       |

\* only significant

**Table S3.2:** The results of the DASS depression scale for the most prevalent chronic diseases.

| Do you have any chronic disease? |                      |       |        |       |                       |                       |         |                       |
|----------------------------------|----------------------|-------|--------|-------|-----------------------|-----------------------|---------|-----------------------|
|                                  | Group                | Mean  | Median | SD    | Kruskal-Wallis H test | Bonferroni correction | p-value | Multiple comparisons* |
| DASS Depression Scale            | I. Mental disorders  | 20.88 | 20.00  | 11.25 | 27.02                 | 0.0071                | 0.008   | I vs. VII<br>(0.000)  |
|                                  | II. Thyroid diseases | 14.96 | 12.00  | 11.56 |                       |                       |         |                       |
|                                  | III. Allergy         | 13.69 | 11.00  | 10.33 |                       |                       |         |                       |

|  |                     |       |       |       |  |  |  |  |
|--|---------------------|-------|-------|-------|--|--|--|--|
|  | <b>IV. Diabetes</b> | 15.47 | 14.00 | 10.60 |  |  |  |  |
|  | <b>V. Asthma</b>    | 14.67 | 14.00 | 10.91 |  |  |  |  |
|  | <b>VI. Other</b>    | 15.03 | 14.00 | 9.79  |  |  |  |  |
|  | <b>VII. No</b>      | 13.12 | 10.00 | 10.32 |  |  |  |  |

\* only significant

**Table S3.3:** The results of the DASS anxiety scale for the most prevalent chronic diseases.

| <b>Do you have any chronic disease?</b> |                             |             |               |           |                              |                              |                |                              |
|-----------------------------------------|-----------------------------|-------------|---------------|-----------|------------------------------|------------------------------|----------------|------------------------------|
|                                         | <b>Group</b>                | <b>Mean</b> | <b>Median</b> | <b>SD</b> | <b>Kruskal–Wallis H test</b> | <b>Bonferroni correction</b> | <b>p-value</b> | <b>Multiple comparisons*</b> |
| <b>DASS Anxiety Scale</b>               | <b>I. Mental disorders</b>  | 14.05       | 12.00         | 11.68     | 43.30                        | 0.0071                       | 0.0000         | I vs. VII (0.001)            |
|                                         | <b>II. Thyroid diseases</b> | 10.23       | 8.00          | 9.68      |                              |                              |                |                              |
|                                         | <b>III. Allergy</b>         | 8.38        | 6.00          | 7.73      |                              |                              |                |                              |
|                                         | <b>IV. Diabetes</b>         | 7.73        | 6.00          | 7.17      |                              |                              |                |                              |
|                                         | <b>V. Asthma</b>            | 11.41       | 9.00          | 10.06     |                              |                              |                |                              |
|                                         | <b>VI. Other</b>            | 9.52        | 8.00          | 8.56      |                              |                              |                |                              |
|                                         | <b>VII. No</b>              | 7.22        | 4.00          | 7.96      |                              |                              |                |                              |

\* only significant

**Table S3.4:** The results of the DASS stress scale for the most prevalent chronic diseases.

| <b>Do you have any chronic disease?</b> |                             |             |               |           |                              |                              |                |                              |
|-----------------------------------------|-----------------------------|-------------|---------------|-----------|------------------------------|------------------------------|----------------|------------------------------|
|                                         | <b>Group</b>                | <b>Mean</b> | <b>Median</b> | <b>SD</b> | <b>Kruskal–Wallis H test</b> | <b>Bonferroni correction</b> | <b>p-value</b> | <b>Multiple comparisons*</b> |
| <b>DASS Stress Scale</b>                | <b>I. Mental disorders</b>  | 23.90       | 24.00         | 11.68     | 42.42                        | 0.0071                       | 0.0000         | I vs. VII (0.001)            |
|                                         | <b>II. Thyroid diseases</b> | 19.86       | 20.00         | 11.37     |                              |                              |                |                              |
|                                         | <b>III. Allergy</b>         | 21.56       | 21.00         | 10.41     |                              |                              |                |                              |
|                                         | <b>IV. Diabetes</b>         | 20.40       | 22.00         | 9.14      |                              |                              |                |                              |
|                                         | <b>V. Asthma</b>            | 18.74       | 20.00         | 10.42     |                              |                              |                |                              |
|                                         | <b>VI. Other</b>            | 19.41       | 20.00         | 12.67     |                              |                              |                |                              |
|                                         | <b>VII. No</b>              | 17.15       | 8.00          | 10.33     |                              |                              |                |                              |

\* only significant

**Table S4:** The results of the DASS total score for the usage of either psychological or psychiatric help before the pandemics outbreak.

| <b>Did you use psychological/psychiatric help before the beginning of the pandemics?</b> |              |             |               |           |                              |                              |                |                              |
|------------------------------------------------------------------------------------------|--------------|-------------|---------------|-----------|------------------------------|------------------------------|----------------|------------------------------|
|                                                                                          | <b>Group</b> | <b>Mean</b> | <b>Median</b> | <b>SD</b> | <b>Kruskal–Wallis H test</b> | <b>Bonferroni correction</b> | <b>p-value</b> | <b>Multiple comparisons*</b> |
| <b>DASS Total Score</b>                                                                  | <b>I. No</b> | 35.43       | 30.00         | 25.15     | 102.22                       | 0.0125                       | 0.000          | I vs. II                     |

|  |                                                        |       |       |       |  |  |  |                      |
|--|--------------------------------------------------------|-------|-------|-------|--|--|--|----------------------|
|  | II. Yes, I used psychological and psychiatric services | 56.71 | 56.00 | 29.53 |  |  |  | (0.000)              |
|  | III. Yes, I used psychological services                | 46.51 | 43.00 | 28.12 |  |  |  | I vs. III<br>(0.000) |
|  | IV. Yes, I used psychiatric services                   | 51.60 | 49.00 | 28.55 |  |  |  | I vs. IV<br>(0.000)  |

\* only significant

**Table S4.2:** The results of the DASS depression scale for the usage of either psychological or psychiatric help before the pandemics outbreak.

| Did you use psychological/psychiatric help before the beginning of the pandemics? |                                                        |       |        |       |                       |                       |         |                       |
|-----------------------------------------------------------------------------------|--------------------------------------------------------|-------|--------|-------|-----------------------|-----------------------|---------|-----------------------|
| DASS Depression Scale                                                             | Group                                                  | Mean  | Median | SD    | Kruskal-Wallis H test | Bonferroni correction | p-value | Multiple comparisons* |
|                                                                                   | I. No                                                  | 12.56 | 10.00  | 9.94  | 78.21                 | 0.0125                | 0.0000  | I vs. II<br>(0.000)   |
|                                                                                   | II. Yes, I used psychological and psychiatric services | 20.15 | 20.00  | 12.18 |                       |                       |         | I vs. III<br>(0.000)  |
|                                                                                   | III. Yes, I used psychological services                | 15.83 | 14.00  | 10.55 |                       |                       |         | I vs. IV<br>(0.000)   |
|                                                                                   | IV. Yes, I used psychiatric services                   | 18.85 | 19.00  | 11.83 |                       |                       |         |                       |

\* only significant

**Table S4.3:** The results of the DASS anxiety scale for the usage of either psychological or psychiatric help before the pandemics outbreak.

| Did you use psychological/psychiatric help before the beginning of the pandemics? |                                                        |       |        |       |                       |                       |         |                       |
|-----------------------------------------------------------------------------------|--------------------------------------------------------|-------|--------|-------|-----------------------|-----------------------|---------|-----------------------|
| DASS Anxiety Scale                                                                | Group                                                  | Mean  | Median | SD    | Kruskal-Wallis H test | Bonferroni correction | p-value | Multiple comparisons* |
|                                                                                   | I. No                                                  | 6.87  | 4.00   | 7.66  | 92.20                 | 0.0125                | 0.000   | I vs. II<br>(0.000)   |
|                                                                                   | II. Yes, I used psychological and psychiatric services | 13.26 | 12.00  | 10.43 |                       |                       |         | I vs. III<br>(0.000)  |
|                                                                                   | III. Yes, I used psychological services                | 10.35 | 8.00   | 9.50  |                       |                       |         | I vs. IV<br>(0.000)   |
|                                                                                   | IV. Yes, I used psychiatric services                   | 12.05 | 10.00  | 9.63  |                       |                       |         |                       |

\* only significant

**Table S4.4:** The results of the DASS stress scale for the usage of either psychological or psychiatric help before the pandemics outbreak.

| Did you use psychological/psychiatric help before the beginning of the pandemics? |                                                        |       |        |       |                       |                       |         |                       |
|-----------------------------------------------------------------------------------|--------------------------------------------------------|-------|--------|-------|-----------------------|-----------------------|---------|-----------------------|
|                                                                                   | Group                                                  | Mean  | Median | SD    | Kruskal–Wallis H test | Bonferroni correction | p-value | Multiple comparisons* |
| DASS Stress Scale                                                                 | I. No                                                  | 15.99 | 14.00  | 10.67 | 76.92                 | 0.0125                | 0.0000  | I vs. II (0.000)      |
|                                                                                   | II. Yes, I used psychological and psychiatric services | 23.29 | 24.00  | 11.62 |                       |                       |         | I vs. III (0.000)     |
|                                                                                   | III. Yes, I used psychological services                | 20.33 | 20.00  | 11.11 |                       |                       |         | I vs. IV (0.001)      |
|                                                                                   | IV. Yes, I used psychiatric services                   | 20.70 | 21.00  | 11.02 |                       |                       |         |                       |

\* only significant

**Table S5:** The results of the DASS total score for the economic situation during pandemics.

| How do you assess your economic situation during pandemics? |                                                                                                                   |       |        |       |                       |                       |         |                       |
|-------------------------------------------------------------|-------------------------------------------------------------------------------------------------------------------|-------|--------|-------|-----------------------|-----------------------|---------|-----------------------|
|                                                             | Group                                                                                                             | Mean  | Median | SD    | Kruskal–Wallis H test | Bonferroni correction | p-value | Multiple comparisons* |
| DASS Total Score                                            | I. I have a stable family income, nothing has changed                                                             | 34.65 | 30.00  | 25.44 | 63.77                 | 0.01                  | 0.0000  | I vs. IV (0.000)      |
|                                                             | II. I have a stable family income, but the situation is worse than before                                         | 41.50 | 36.00  | 26.31 |                       |                       |         |                       |
|                                                             | III. I barely have enough money for living                                                                        | 46.07 | 40.00  | 33.32 |                       |                       |         |                       |
|                                                             | IV. I have to start using savings                                                                                 | 46.20 | 40.00  | 28.34 |                       |                       |         |                       |
|                                                             | V. I have to borrow money from my family/friends during the outbreak of the pandemic because I do not have enough | 57.28 | 56.00  | 29.25 |                       |                       |         | I vs. V (0.001)       |

|  |                         |  |  |  |  |  |  |  |
|--|-------------------------|--|--|--|--|--|--|--|
|  | money to support myself |  |  |  |  |  |  |  |
|--|-------------------------|--|--|--|--|--|--|--|

\* only significant

**Table S5.2:** The results of the DASS depression scale for the economic situation during pandemics.

| How do you assess your economic situation during pandemics? |                                                                                                                                           |       |        |       |                       |                       |         |                       |
|-------------------------------------------------------------|-------------------------------------------------------------------------------------------------------------------------------------------|-------|--------|-------|-----------------------|-----------------------|---------|-----------------------|
|                                                             | Group                                                                                                                                     | Mean  | Median | SD    | Kruskal–Wallis H test | Bonferroni correction | p-value | Multiple comparisons* |
| DASS Depression Scale                                       | I. I have a stable family income, nothing has changed                                                                                     | 12.36 | 10.00  | 10.09 | 51.87                 | 0,01                  | 0.0000  | I vs. IV (0.000)      |
|                                                             | II. I have a stable family income, but the situation is worse than before                                                                 | 14.36 | 12.00  | 10.24 |                       |                       |         |                       |
|                                                             | III. I barely have enough money for living                                                                                                | 18.77 | 16.00  | 14.63 |                       |                       |         | I vs. V (0.001)       |
|                                                             | IV. I have to start using savings                                                                                                         | 16.29 | 14.00  | 11.05 |                       |                       |         |                       |
|                                                             | V. I have to borrow money from my family/friends during the outbreak of the pandemic because I do not have enough money to support myself | 21.20 | 20.00  | 11.37 |                       |                       |         |                       |

\* only significant

**Table S5.3:** The results of the DASS anxiety scale for the economic situation during pandemics.

| How do you assess your economic situation during pandemics? |                                                       |      |        |      |                       |                       |         |                       |
|-------------------------------------------------------------|-------------------------------------------------------|------|--------|------|-----------------------|-----------------------|---------|-----------------------|
|                                                             | Group                                                 | Mean | Median | SD   | Kruskal–Wallis H test | Bonferroni correction | p-value | Multiple comparisons* |
| DASS Anxiety Scale                                          | I. I have a stable family income, nothing has changed | 6.67 | 4.00   | 7.81 | 58.80                 | 0.01                  | 0.000   | I vs. IV (0.000)      |
|                                                             | II. I have a stable family income, but the situation  | 8.86 | 6.00   | 8.53 |                       |                       |         |                       |



|  |                                                                                                                                           |       |       |      |  |  |  |                    |
|--|-------------------------------------------------------------------------------------------------------------------------------------------|-------|-------|------|--|--|--|--------------------|
|  | is worse than before                                                                                                                      |       |       |      |  |  |  |                    |
|  | III. I barely have enough money for living                                                                                                | 9.03  | 8.00  | 7.52 |  |  |  |                    |
|  | IV. I have to start using savings                                                                                                         | 9.92  | 6.00  | 9.38 |  |  |  |                    |
|  | V. I have to borrow money from my family/friends during the outbreak of the pandemic because I do not have enough money to support myself | 12.24 | 10.00 | 9.87 |  |  |  | I vs. V<br>(0.012) |

\* only significant

**Table S5.4:** The results of the DASS stress scale for the economic situation during pandemics.

| How do you assess your economic situation during pandemics? |                                                                                                                                           |       |        |       |                       |                       |         |                       |
|-------------------------------------------------------------|-------------------------------------------------------------------------------------------------------------------------------------------|-------|--------|-------|-----------------------|-----------------------|---------|-----------------------|
|                                                             | Group                                                                                                                                     | Mean  | Median | SD    | Kruskal–Wallis H test | Bonferroni correction | p-value | Multiple comparisons* |
| DASS Stress Scale                                           | I. I have a stable family income, nothing has changed                                                                                     | 15.62 | 14.00  | 10.72 | 51.44                 | 0.01                  | 0.0000  | I vs. II<br>(0.000)   |
|                                                             | II. I have a stable family income, but the situation is worse than before                                                                 | 18.28 | 18.00  | 10.81 |                       |                       |         |                       |
|                                                             | III. I barely have enough money for living                                                                                                | 18.26 | 16.00  | 13.85 |                       |                       |         | I vs. IV<br>(0.000)   |
|                                                             | V. I have to borrow money from my family/friends during the outbreak of the pandemic because I do not have enough money to support myself | 23.84 | 28.00  | 12.36 |                       |                       |         | I vs. V<br>(0.006)    |

\* only significant

**Table S6:** The results of the DASS total score for the current employment situation.

| Are you currently working? |                           |       |        |       |                       |                       |         |                       |
|----------------------------|---------------------------|-------|--------|-------|-----------------------|-----------------------|---------|-----------------------|
|                            | Group                     | Mean  | Median | SD    | Kruskal–Wallis H test | Bonferroni correction | p-value | Multiple comparisons* |
| DASS Total Score           | I. No, I do not work      | 39.11 | 34.00  | 26.66 | 17.76                 | 0.0125                | 0.0005  | I vs. II (0.012)      |
|                            | II. I work mentally       | 34.09 | 28.00  | 26.65 |                       |                       |         |                       |
|                            | III. I work physically    | 33.58 | 28.00  | 22.01 |                       |                       |         |                       |
|                            | IV. I run my own business | 26.29 | 19.00  | 23.10 |                       |                       |         |                       |

\* only significant

**Table S6.2:** The results of the DASS depression scale for the current employment situation.

| Are you currently working? |                           |       |        |       |                       |                       |         |                       |
|----------------------------|---------------------------|-------|--------|-------|-----------------------|-----------------------|---------|-----------------------|
|                            | Group                     | Mean  | Median | SD    | Kruskal–Wallis H test | Bonferroni correction | p-value | Multiple comparisons* |
| DASS Depression Scale      | I. No, I do not work      | 13.92 | 12.00  | 10.47 | 30.50                 | 0.0125                | 0.0000  | I vs. II (0.002)      |
|                            | II. I work mentally       | 11.69 | 8.00   | 10.27 |                       |                       |         |                       |
|                            | III. I work physically    | 11.90 | 10.00  | 9.33  |                       |                       |         | I vs. IV (0.000)      |
|                            | IV. I run my own business | 7.36  | 4.00   | 9.65  |                       |                       |         |                       |

\* only significant

**Table S6.3:** The results of the DASS anxiety scale for the current employment situation.

| Are you currently working? |                           |      |        |      |                       |                       |         |                       |
|----------------------------|---------------------------|------|--------|------|-----------------------|-----------------------|---------|-----------------------|
|                            | Group                     | Mean | Median | SD   | Kruskal–Wallis H test | Bonferroni correction | p-value | Multiple comparisons* |
| DASS Anxiety Scale         | I. No, I do not work      | 7.90 | 6.00   | 8.42 | 6.33                  | -                     | 0.0967  | -                     |
|                            | II. I work mentally       | 6.91 | 4.00   | 7.95 |                       |                       |         |                       |
|                            | III. I work physically    | 6.92 | 4.00   | 7.16 |                       |                       |         |                       |
|                            | IV. I run my own business | 5.07 | 2.00   | 6.05 |                       |                       |         |                       |

\* only significant

**Table S6.4:** The results of the DASS stress scale for the current employment situation.

Are you currently working?

|                   | Group                     | Mean  | Median | SD    | Kruskal–Wallis H test | Bonferroni correction | p-value | Multiple comparisons* |
|-------------------|---------------------------|-------|--------|-------|-----------------------|-----------------------|---------|-----------------------|
| DASS Stress Score | I. No, I do not work      | 17.29 | 16.00  | 10.92 | 13.96                 | 0.0125                | 0.0030  | -                     |
|                   | II. I work mentally       | 15.49 | 14.00  | 11.47 |                       |                       |         |                       |
|                   | III. I work physically    | 14.77 | 14.00  | 9.94  |                       |                       |         |                       |
|                   | IV. I run my own business | 13.86 | 11.00  | 11.59 |                       |                       |         |                       |

\* only significant

**Table S7:** The results of the DASS total score for the current living situation.

| I live with:     |                                |       |        |       |                       |                       |         |                       |
|------------------|--------------------------------|-------|--------|-------|-----------------------|-----------------------|---------|-----------------------|
|                  | Group                          | Mean  | Median | SD    | Kruskal–Wallis H test | Bonferroni correction | p-value | Multiple comparisons* |
| DASS Total Score | I. Alone                       | 34.96 | 30.00  | 26.42 | 16.37                 | 0.01                  | 0.0026  | II vs. III (0.015)    |
|                  | II. Parents                    | 49.53 | 34.00  | 27.02 |                       |                       |         |                       |
|                  | III. Partner or spouse         | 34.35 | 26.00  | 36.11 |                       |                       |         |                       |
|                  | IV. Roommates                  | 39.03 | 34.00  | 25.82 |                       |                       |         |                       |
|                  | V. Partner/spouse and children | 30.95 | 28.00  | 19.11 |                       |                       |         |                       |

\* only significant

**Table S7.2:** The results of the DASS depression scale for the current living situation.

| I live with:          |                                |       |        |       |                       |                       |         |                       |
|-----------------------|--------------------------------|-------|--------|-------|-----------------------|-----------------------|---------|-----------------------|
|                       | Group                          | Mean  | Median | SD    | Kruskal–Wallis H test | Bonferroni correction | p-value | Multiple comparisons* |
| DASS Depression Scale | I. Alone                       | 13.07 | 10.00  | 10.63 | 37.23                 | 0.01                  | 0.0000  | II vs. III (0.000)    |
|                       | II. Parents                    | 14.24 | 12.00  | 10.59 |                       |                       |         |                       |
|                       | III. Partner or spouse         | 10.79 | 8.00   | 9.65  |                       |                       |         |                       |
|                       | IV. Roommates                  | 13.88 | 12.00  | 10.32 |                       |                       |         |                       |
|                       | V. Partner/spouse and children | 8.48  | 8.00   | 7.67  |                       |                       |         |                       |

\* only significant

**Table S7.3:** The results of the DASS anxiety scale for the current living situation.

| I live with:       |       |      |        |    |                       |                       |         |                       |
|--------------------|-------|------|--------|----|-----------------------|-----------------------|---------|-----------------------|
| DASS Anxiety Scale | Group | Mean | Median | SD | Kruskal–Wallis H test | Bonferroni correction | p-value | Multiple comparisons* |

|  |                                       |      |      |      |      |   |        |   |
|--|---------------------------------------|------|------|------|------|---|--------|---|
|  | <b>I. Alone</b>                       | 7.03 | 4.00 | 7.88 | 5.86 | - | 0.2102 | - |
|  | <b>II. Parents</b>                    | 7.96 | 6.00 | 8.43 |      |   |        |   |
|  | <b>III. Partner or spouse</b>         | 7.34 | 4.00 | 8.50 |      |   |        |   |
|  | <b>IV. Roommates</b>                  | 7.80 | 6.00 | 8.18 |      |   |        |   |
|  | <b>V. Partner/spouse and children</b> | 5.05 | 4.00 | 5.05 |      |   |        |   |

\* only significant

**Table S7.4:** The results of the DASS stress scale for the current living situation.

| <b>I live with:</b>      |                                       |             |               |           |                              |                              |                |                              |
|--------------------------|---------------------------------------|-------------|---------------|-----------|------------------------------|------------------------------|----------------|------------------------------|
|                          | <b>Group</b>                          | <b>Mean</b> | <b>Median</b> | <b>SD</b> | <b>Kruskal–Wallis H test</b> | <b>Bonferroni correction</b> | <b>p-value</b> | <b>Multiple comparisons*</b> |
| <b>DASS Stress Scale</b> | <b>I. Alone</b>                       | 14.87       | 14.00         | 11.31     | 13.12                        | 0.01                         | 0.0107         | I vs. II (0.012)             |
|                          | <b>II. Parents</b>                    | 17.33       | 16.00         | 11.09     |                              |                              |                | I vs. IV (0.019)             |
|                          | <b>III. Partner or spouse</b>         | 16.22       | 14.00         | 10.85     |                              |                              |                |                              |
|                          | <b>IV. Roommates</b>                  | 17.36       | 16.00         | 10.69     |                              |                              |                |                              |
|                          | <b>V. Partner/spouse and children</b> | 17.43       | 16.00         | 9.10      |                              |                              |                |                              |

\* only significant

**Table S8:** The sociodemographic data of the respondents.

| <b>SOCIODEMOGRAPHIC DATA</b>     |                             |        |     |        |     |        |                   |        |
|----------------------------------|-----------------------------|--------|-----|--------|-----|--------|-------------------|--------|
| Variables                        |                             | DASS 0 |     | DASS 2 |     | OR     | IC                | s      |
|                                  |                             | n      | %   | n      | %   |        |                   |        |
| Sex<br>(p<0.00001)               | Women                       | 198    | 60% | 316    | 82% | 3.0121 | 2.1479 to 4.2239  | 0.0001 |
|                                  | Men                         | 134    | 40% | 71     | 18% |        |                   |        |
| Field of study<br>(p=0.02778)    | Arts and humanities         | 10     | 3%  | 23     | 6%  | 1.9826 | 0.9301 to 4.2258  | 0.07   |
|                                  | Sciences                    | 11     | 3%  | 26     | 7%  | 2.0374 | 0.9916 to 4.1863  | 0.05   |
|                                  | Medicine                    | 209    | 63% | 206    | 54% | 0.8496 | 0.6669 to 1.0824  | 0.187  |
|                                  | Engineering                 | 32     | 10% | 38     | 10% | 1.0236 | 0.6254 to 1.6754  | 0.926  |
|                                  | Social sciences             | 69     | 21% | 91     | 24% | 1.1368 | 0.8046 to 1.6063  | 0.467  |
| I live with:<br>(p=0.05078)      | Alone                       | 49     | 15% | 35     | 9%  | 0.6128 | 0.3877 to 0.9686  | 0.03   |
|                                  | Parents                     | 157    | 47% | 206    | 53% | 1.1256 | 0.8730 to 1.4514  | 0.361  |
|                                  | Roommates                   | 65     | 20% | 95     | 25% | 1.2538 | 0.8854 to 1.7755  | 0.202  |
|                                  | Partner or spouse           | 60     | 18% | 49     | 13% | 0.7006 | 0.4673 to 1.0503  | 0.08   |
|                                  | Partner/spouse and children | 1      | 0%  | 1      | 0%  | 0.8579 | 0.0534 to 13.7693 | 0.913  |
| <b>DATA RELATED TO HEALTH</b>    |                             |        |     |        |     |        |                   |        |
| Do you have any chronic disease? | No                          | 306    | 92% | 295    | 76% |        |                   |        |
|                                  | Thyroid diseases            | 7      | 2%  | 25     | 6%  | 3.7046 | 1.5783 to 8.6957  | 0.002  |

|                                                                                               |                                                    |     |     |     |     |          |                      |        |
|-----------------------------------------------------------------------------------------------|----------------------------------------------------|-----|-----|-----|-----|----------|----------------------|--------|
| (p<0.00001)                                                                                   | Mental disorders                                   | 3   | 1%  | 17  | 4%  | 5.8780   | 1.7048 to 20.2668    | 0.005  |
|                                                                                               | Other                                              | 8   | 2%  | 26  | 7%  | 3.3712   | 1.5021 to 7.5661     | 0.003  |
| Did you use psychological/psychiatric help before the beginning of the pandemics? (p<0.00001) | No                                                 | 304 | 92% | 264 | 68% |          |                      |        |
|                                                                                               | Yes, I used psychological services                 | 16  | 5%  | 44  | 11% | 3.1667   | 1.7458 to 5.7440     | 0.0001 |
|                                                                                               | Yes, I used psychiatric services                   | 4   | 1%  | 28  | 7%  | 8.0606   | 2.7911 to 23.2789    | 0.0001 |
|                                                                                               | Yes, I used psychological and psychiatric services | 8   | 2%  | 51  | 13% | 7.3409   | 3.4216 to 15.7497    | 0.0001 |
| Did you use psychological/psychiatric help during the pandemics? (P<0.00001)                  | No                                                 | 330 | 99% | 352 | 91% |          |                      |        |
|                                                                                               | Yes, I used psychological services                 | 2   | 1%  | 13  | 3%  | 0.1442   | 0.0323 to 0.6440     | 0.01   |
|                                                                                               | Yes, I used psychiatric services                   | 0   | 0%  | 12  | 3%  | -        |                      |        |
|                                                                                               | Yes, I used psychological and psychiatric services | 0   | 0%  | 10  | 3%  | -        |                      |        |
| What was the most difficult for you during pandemics? (p<0.00001)                             | Fear of being infected                             | 11  | 3%  | 17  | 4%  | 62.3913  | 3.4246 to 1136.6806  | 0.005  |
|                                                                                               | Fear of infection of the loved ones                | 106 | 32% | 105 | 27% | 41.3886  | 2.4711 to 693.2239   | 0.009  |
|                                                                                               | Concern about education                            | 12  | 4%  | 8   | 2%  | 27.8800  | 1.4773 to 526.1439   | 0.02   |
|                                                                                               | Loneliness                                         | 6   | 2%  | 42  | 12% | 293.3077 | 15.7710 to 5454.9184 | 0.0001 |
|                                                                                               | Isolation                                          | 26  | 8%  | 43  | 11% | 67.3019  | 3.9058 to 1159.7023  | 0.003  |
|                                                                                               | Financial unstability                              | 30  | 9%  | 32  | 8%  | 43.6885  | 2.5306 to 754.2515   | 0.009  |
|                                                                                               | Change of the lifestyle                            | 41  | 12% | 70  | 18% | 69.6506  | 4.1039 to 1182.0880  | 0.003  |
|                                                                                               | Changes awaiting the world after the pandemics     | 79  | 24% | 65  | 17% | 33.7799  | 2.0045 to 569.2524   | 0.01   |
|                                                                                               | I was not afraid                                   | 20  | 6%  | 0   | 0%  |          |                      |        |
| ECONOMIC SITUATION                                                                            |                                                    |     |     |     |     |          |                      |        |
| Are you currently working? (p=0.00191)                                                        | No, I do not work                                  | 258 | 78% | 340 | 88% |          |                      |        |
|                                                                                               | I work mentally                                    | 52  | 16% | 37  | 10% | 0.5399   | 0.3437 to 0.8481     | 0.007  |
|                                                                                               | I work physically                                  | 14  | 4%  | 8   | 2%  | 0.4336   | 0.1792 to 1.0492     | 0.06   |
| How do you assess your economic situation during pandemics? (p<0.00001)                       | I have a stable family income, nothing has changed | 236 | 71% | 175 | 45% | -        | -                    | -      |
|                                                                                               | I have a stable family income,                     | 73  | 22% | 135 | 35% | 2.4939   | 1.7655 to 3.5229     | 0.0001 |

|  |                                                                                                                                        |    |    |    |     |         |                    |        |
|--|----------------------------------------------------------------------------------------------------------------------------------------|----|----|----|-----|---------|--------------------|--------|
|  | but the situation is worse than before                                                                                                 |    |    |    |     |         |                    |        |
|  | I have to start using savings                                                                                                          | 15 | 5% | 57 | 15% | 5.1246  | 2.8084 to 9.3511   | 0.0001 |
|  | I have to borrow money from my family/friends during the outbreak of the pandemic because I do not have enough money to support myself | 1  | 0% | 10 | 3%  | 13.4857 | 1.7103 to 106.3328 | 0.01   |
|  | I barely have enough money for living                                                                                                  | 4  | 1% | 10 | 3%  | 1.9265  | 0.7191 to 5.1614   | 0.192  |
